# Supplementary material for: Pan-cancer analysis distinguishes transcriptional changes of aneuploidy from proliferation
Source: HighWire-hosted journal article supplement (doi:10.1101/gr.212225.116), 2017-03-20
Supplement: Supplemental_Table_S2.xlsx [file Supplemental_Table_S2.xlsx]

## Sheet: Sheet1
Symbol	log2FoldChange	FDR	Gene Description
Atp6v1h	-0.0568697	0.999213	ATPase, H+ transporting, lysosomal V1 subunit H; Subunit of the peripheral V1 complex of vacuolar ATPase. Subunit H activates the ATPase activity of the enzyme and couples ATPase activity to proton flow. Vacuolar ATPase is responsible for acidifying a variety of intracellular compartments in eukaryotic cells, thus providing most of the energy required for transport processes in the vacuolar syste…
Atp6v0e	-0.33051	0.999213	ATPase, H+ transporting, lysosomal V0 subunit E; Vacuolar ATPase is responsible for acidifying a variety of intracellular compartments in eukaryotic cells (By similarity)
Ctsb	-0.181975	0.999213	cathepsin B; Thiol protease which is believed to participate in intracellular degradation and turnover of proteins. Has also been implicated in tumor invasion and metastasis
Ctsd	-0.163503	0.999213	cathepsin D; Acid protease active in intracellular protein breakdown
Lamp1	-0.0369072	0.999213	lysosomal-associated membrane protein 1; Presents carbohydrate ligands to selectins. Also implicated in tumor cell metastasis
Sqstm1	-0.140338	0.999213	sequestosome 1; Required both for the formation and autophagic degradation of polyubiquitin-containing bodies, called ALIS (aggresome-like induced structures). Links ALIS to the autophagic machinery via direct interaction with MAP1 LC3 family members. May regulate the activation of NFKB1 by TNF-alpha, nerve growth factor (NGF) and interleukin-1. May play a role in titin/TTN downstream signaling i…
Ctsa	0.138924	0.999213	cathepsin A; Protective protein appears to be essential for both the activity of beta-galactosidase and neuraminidase, it associates with these enzymes and exerts a protective function necessary for their stability and activity. This protein is also a carboxypeptidase and can deamidate tachykinins
Vps8	0.111305	0.999213	vacuolar protein sorting 8 homolog (S. cerevisiae)
Atg9b	0.042371	0.999213	autophagy related 9B; Plays a role in autophagy
Vps18	0.0835307	0.999213	vacuolar protein sorting 18 (yeast); May play a role in vesicle-mediated protein trafficking to lysosomal compartments and in membrane docking/fusion reactions of late endosomes/lysosomes (By similarity)
Atp6v0d2	-0.387008	0.999213	ATPase, H+ transporting, lysosomal V0 subunit D2; Subunit of the integral membrane V0 complex of vacuolar ATPase. Vacuolar ATPase is responsible for acidifying a variety of intracellular compartments in eukaryotic cells, thus providing most of the energy required for transport processes in the vacuolar system (By similarity). May play a role in coupling of proton transport and ATP hydrolysis. Reg…
Clcn7	0.0588912	0.999213	chloride channel 7; Slowly voltage-gated channel mediating the exchange of chloride ions against protons. Functions as antiporter and contributes to the acidification of the lysosome lumen
Wipi1	-0.0683902	0.999213	WD repeat domain, phosphoinositide interacting 1; Plays an important role in autophagy and in particular starvation- and calcium-mediated autophagy, as well as in mitophagy. Functions upstream of the ATG12-ATG5-ATG16L1 complex and LC3, and downstream of the ULK1 and PI3-kinase complexes. Involved in xenophagy of Staphylococcus aureus. Invading S.aureus cells become entrapped in autophagosome-like…
Ctsf	0.183552	0.999213	cathepsin F; Thiol protease which is believed to participate in intracellular degradation and turnover of proteins. Has also been implicated in tumor invasion and metastasis
Map1lc3b	-0.0459282	0.999213	microtubule-associated protein 1 light chain 3 beta; Probably involved in formation of autophagosomal vacuoles (autophagosomes)
Vps11	-0.0297942	0.999213	vacuolar protein sorting 11 (yeast); May play a role in vesicle-mediated protein trafficking to lysosomal compartments and in membrane docking/fusion reactions of late endosomes/lysosomes (By similarity)
Atp6v1d	0.138368	0.999213	ATPase, H+ transporting, lysosomal V1 subunit D; Subunit of the peripheral V1 complex of vacuolar ATPase. Vacuolar ATPase is responsible for acidifying a variety of intracellular compartments in eukaryotic cells, thus providing most of the energy required for transport processes in the vacuolar system (By similarity)
Uvrag	-0.216069	0.999213	UV radiation resistance associated gene
Mcoln1	-0.0480838	0.999213	mucolipin 1; Cation channel probably playing a role in the endocytic pathway and in the control of membrane trafficking of proteins and lipids. Could play a major role in Ca(2+) transport regulating lysosomal exocytosis (By similarity)
Gene expression between K and KM tumors for genes from TFEB-signature (Santaguida et al. 2015)
